# Supplementary material for: Near-continuous observation of soil surface changes at single slopes with high spatial resolution via an automated SfM photogrammetric mapping approach
Source: Copernicus journal article supplement (doi:10.5194/soil-11-1007-2025), 2025-12-01
Supplement: Supplementary file [file soil-11-1007-2025-supplement-title-page.pdf › soil-11-1007-2025-supplement-title-page.pdf]

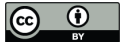

## *Supplement of*

# **Near-continuous observation of soil surface changes at single slopes with high spatial resolution via an automated SfM photogrammetric mapping approach**

**Oliver Grothum et al.**

*Correspondence to:* Anette Eltner ([anette.eltner@tu-dresden.de](mailto:anette.eltner@tu-dresden.de))

- soil-11-1007-2025-supplement-title-page.pdf
- supplement
  - SetupCameras
    - \* DocumentationSystemSetup.pdf
    - \* arduino\_control.zip
    - \* instruction\_setup\_PiSchedules.txt
    - \* pi\_pythonScripts.zip
  - animation\_soilSurfaceChange
    - \* changes\_lower\_slope.zip
    - \* changes\_middle\_slope.zip
    - \* changes\_upper\_slope.zip
  - scripts\_TimeLapseErosion
    - \* .gitignore
    - \* \_\_init\_\_.py
    - \* definitions.py
    - \* demo
    - \* req
    - \* scripts
    - \* src
    - \* third\_party

The copyright of individual parts of the supplement might differ from the article licence.
